# Supplementary material for: Diamino protic ionic liquids for CO2 capture
Source: Royal Society of Chemistry journal article supplement (doi:10.1039/c3cp54082k), 2013-01-01
Supplement: c3cp54082k.pdf [file c3cp54082k.pdf]

## **ELECTRONIC SUPPLIMENTARY INFORMATION**

**to accompany**

### **Novel protic ionic liquids for CO<sub>2</sub> capture**

**R. Vijayraghavan<sup>a</sup>, Steven J. Pas<sup>b,c</sup>, Ekaterina I. Izgorodina<sup>a</sup> and Douglas R. MacFarlane<sup>a\*</sup>**

| S. No | Systems investigated                        | Density @ 25 ° C /<br>(g/cm <sup>3</sup> ) | Viscosity @ 25 ° C /<br>(mPa.s) ± 1% |
|-------|---------------------------------------------|--------------------------------------------|--------------------------------------|
| 1     | MEA : Water(30:70 wt%)                      | 1.01                                       | 2.3                                  |
| 2     | MEA : Water(30:70 wt%)<br>+ CO <sub>2</sub> | 1.13                                       | 3.6                                  |
| 3     | DMEDAH acetate : water<br>(1:1 by mole)     | 1.01                                       | 193                                  |
| 4     | DMEDAH Formate                              | 1.03                                       | 105                                  |
| 5     | DMEDAH Formate + CO <sub>2</sub>            | 1.10                                       | 397                                  |

**ESI – 1 : Density and Viscosity of ILs – before and after absorption of CO<sub>2</sub>**

| S. No | System                                                  | pH   |
|-------|---------------------------------------------------------|------|
| 1     | MEA : Water(30:70 wt%)<br>1M solution                   | 11.3 |
| 2     | MEA : Water(30:70 wt%) + CO <sub>2</sub><br>1M solution | 9.0  |
| 3     | DMEDAH Formate<br>1M solution                           | 9.1  |
| 4     | DMEDAH Formate + CO <sub>2</sub><br>1M solution         | 7.3  |

**ESI – 2: pH of IL & MEA working solution (30:70 wt%) – before and after absorption of CO<sub>2</sub>**

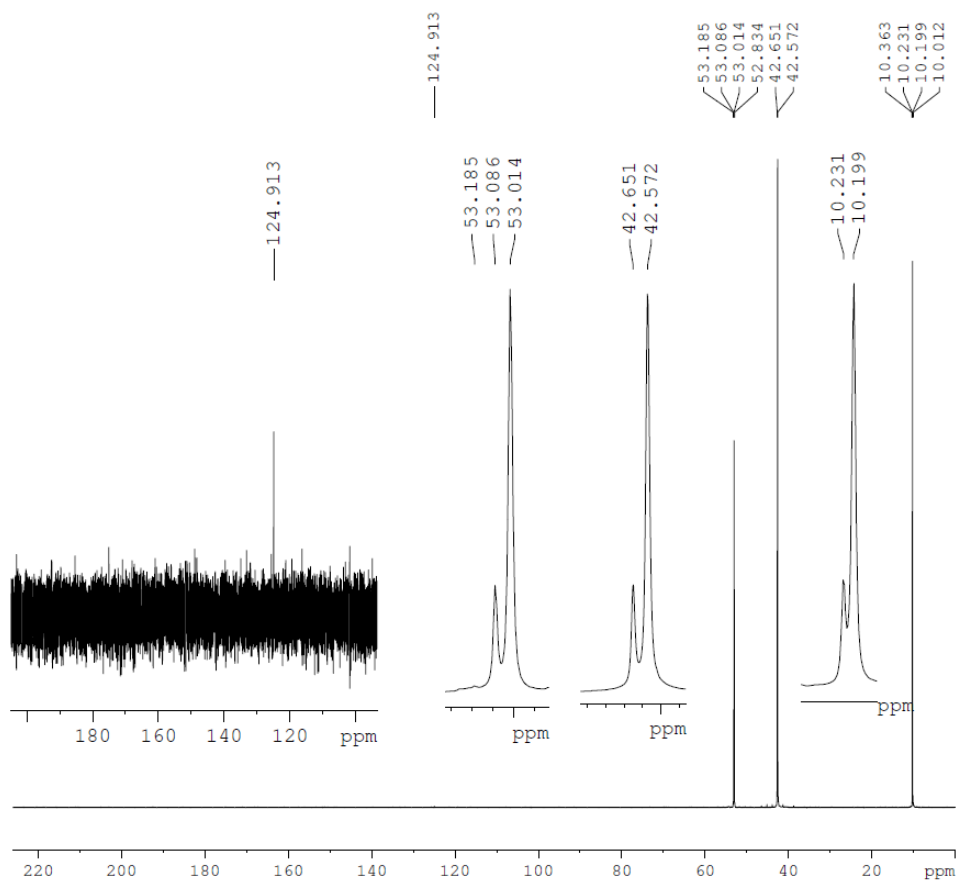

ESI - 3 :  $^{13}\text{C}$  NMR Spectrum of N112HCl : Water (70:30 WT%) mixture with  $\text{CO}_2$

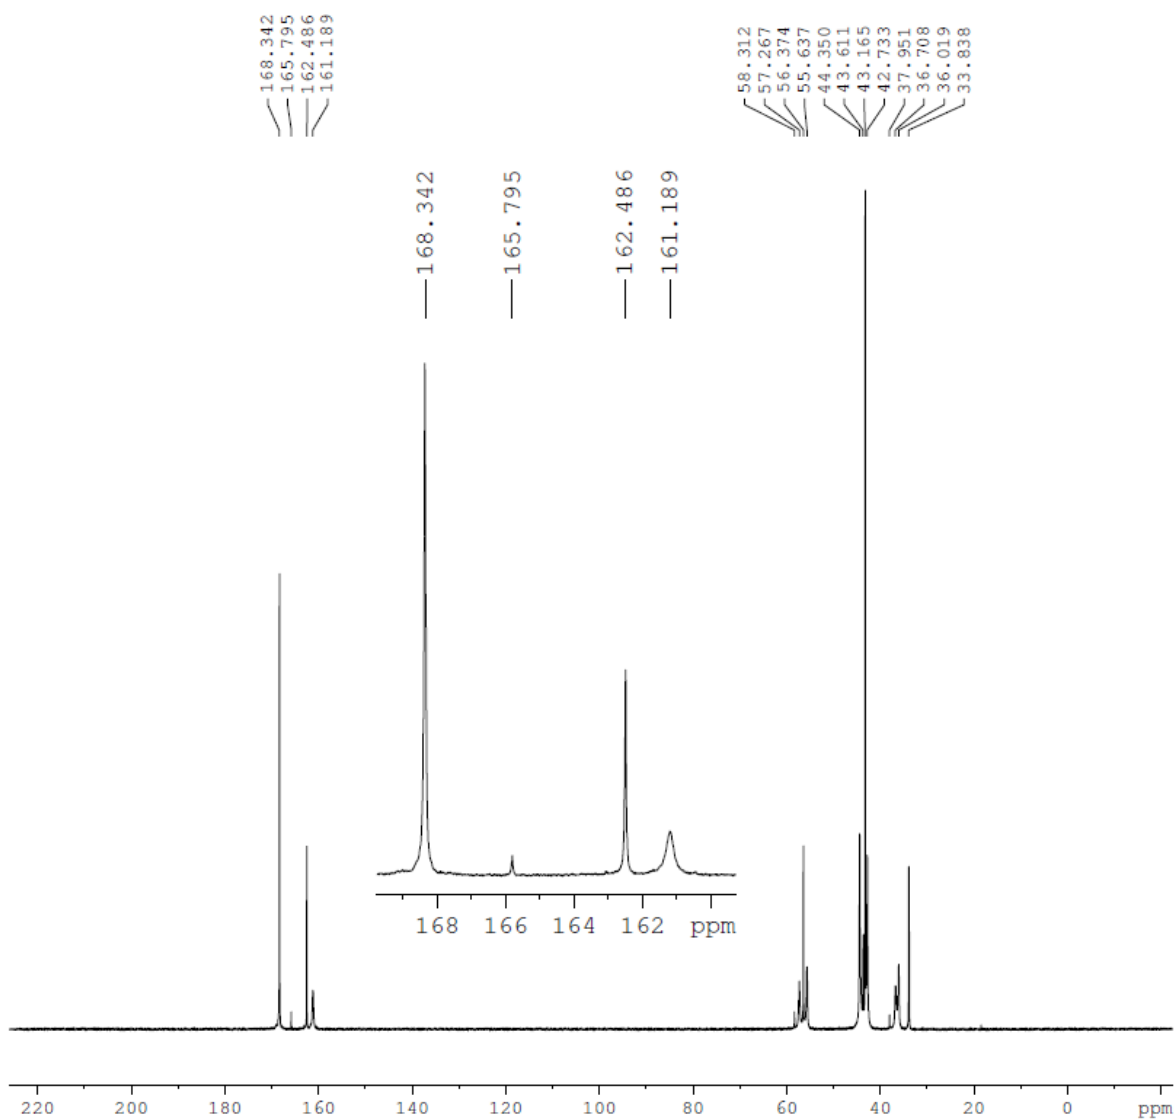

ESI - 4 :  $^{13}\text{C}$  NMR Spectrum of DMEDAH Formate with  $\text{CO}_2$

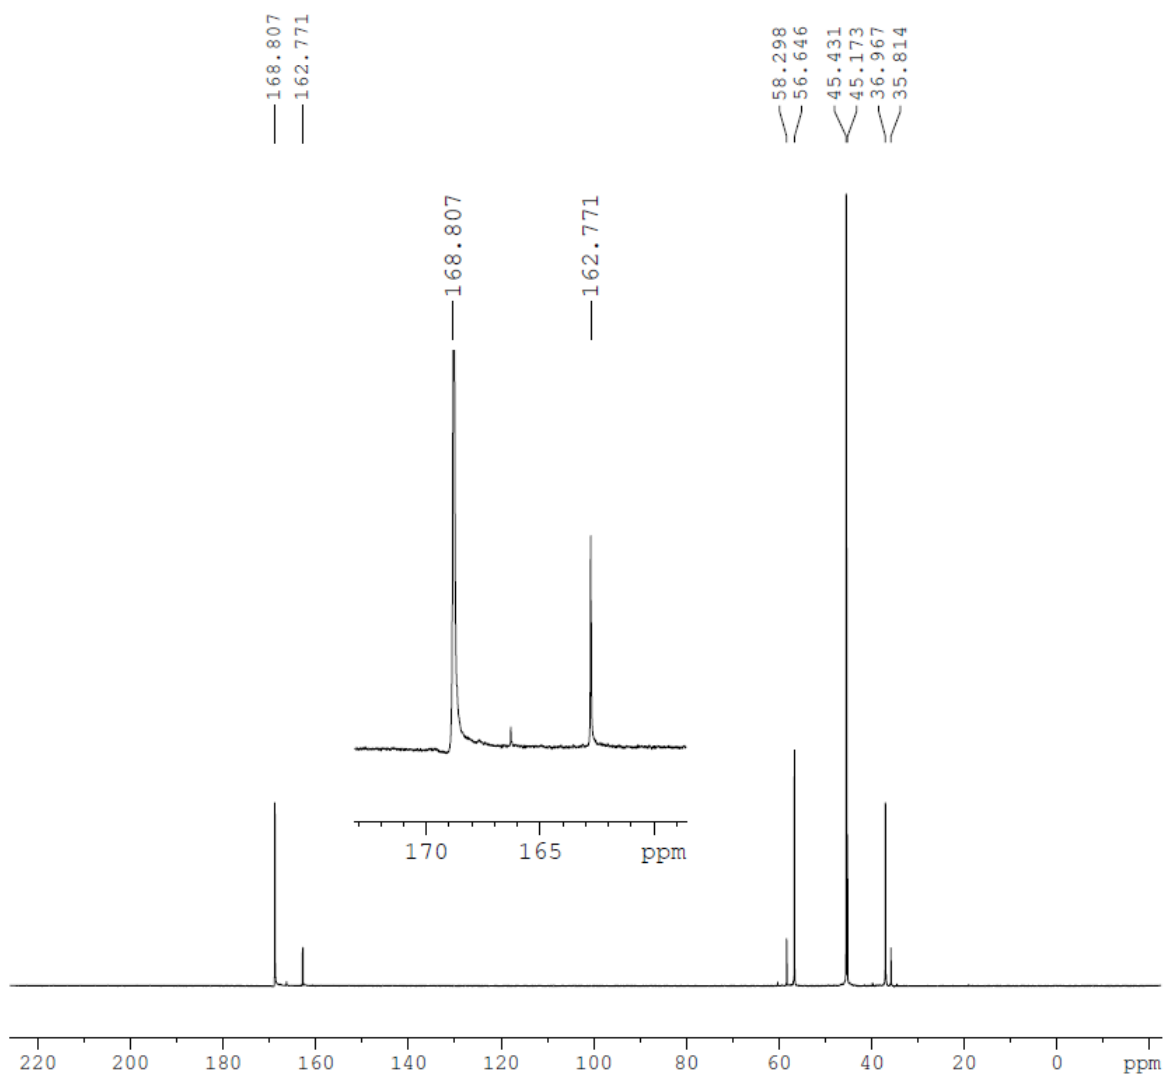

**ESI - 5 :  $^{13}\text{C}$  NMR Spectrum of neat DMEDAH Formate ionic liquid**

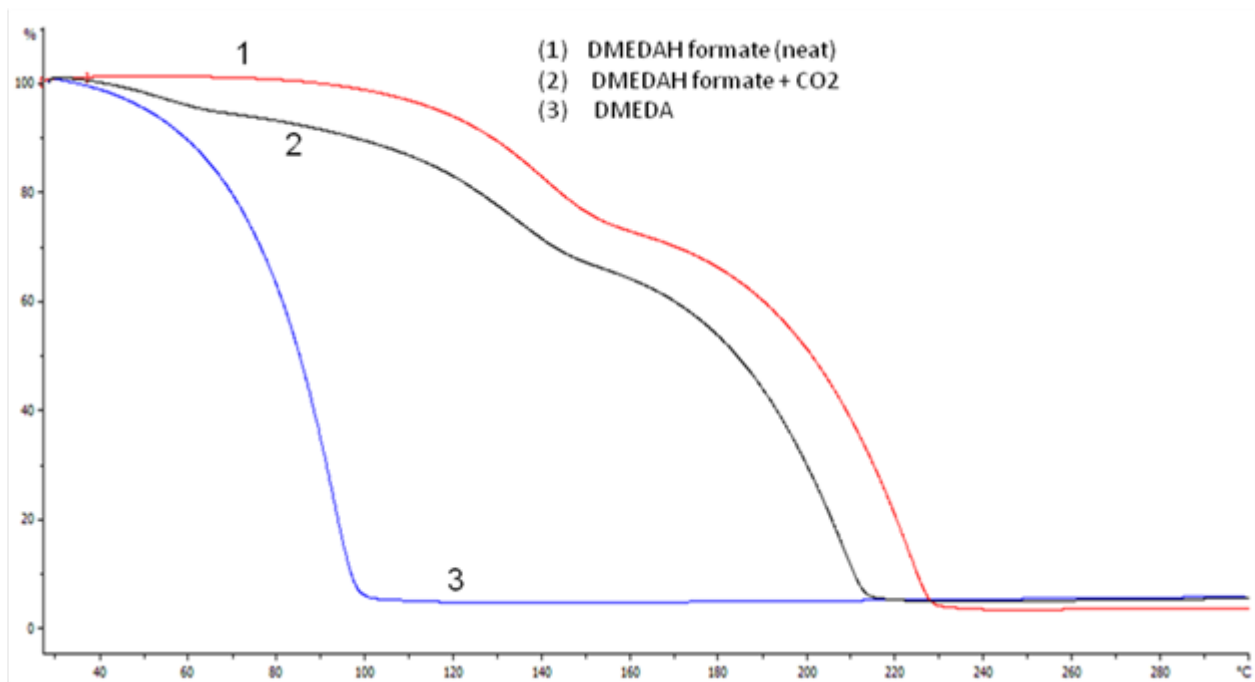

ESI-6 : TGA curves of neat ionic liquid with CO<sub>2</sub> and the corresponding amine

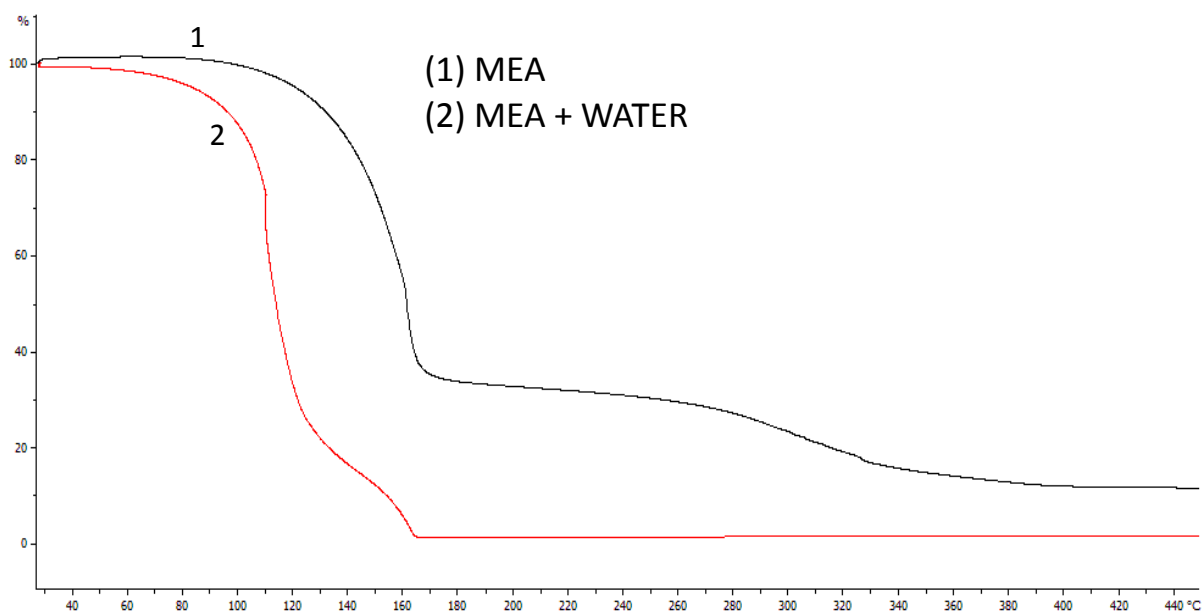

**ESI-7 : TGA curves of neat MEA and MEA + Water (30:70 wt %)**

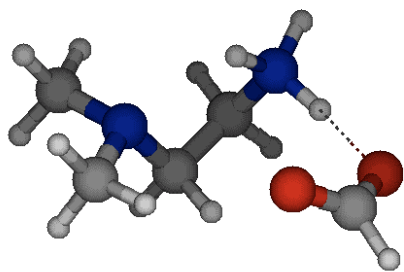

IP1

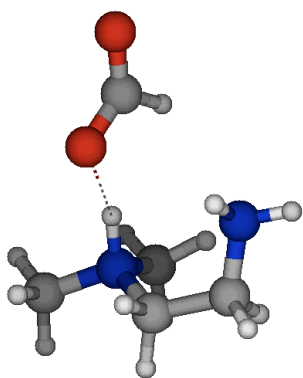

IP2

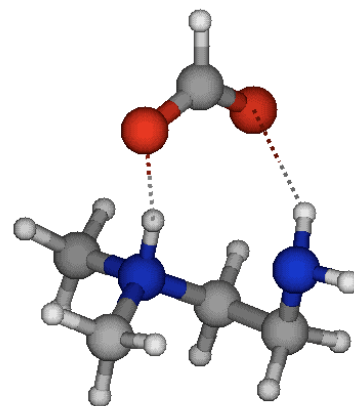

IP3

**ESI-8 : Optimized structures of the isolated ion pairs with the formate anion**
